# Supplementary material for: Development and Optimisation of Tumour Treating Fields (TTFields) Delivery within 3D Primary Glioma Stem Cell-like Models of Spatial Heterogeneity
Source: MDPI journal article supplement (doi:10.3390/cancers16050863), 2024-02-21

Figure 4E

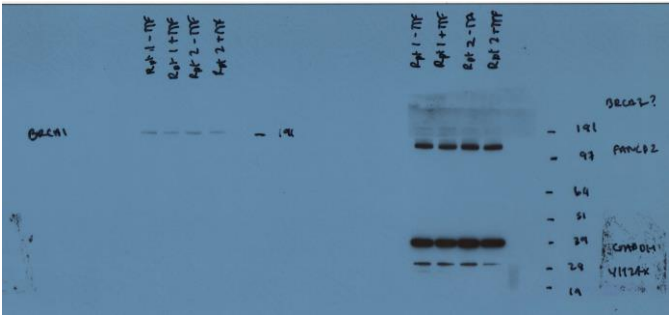

Figure 4E

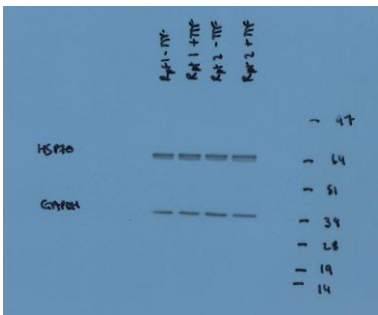

Figure 4F

| Protein | Condition/Lane | Densitometry area |
|---------|----------------|-------------------|
| GAPDH   | G1 Rpt 1 - TTF | 19702.765         |
|         | G1 Rpt 1 + TTF | 21307.522         |
|         | G1 Rpt 2 - TTF | 24516.3           |
|         | G1 Rpt2 + TTF  | 22832.815         |
| HSP70   | G1 Rpt1 - TTF  | 27408.999         |
|         | G1 Rpt1 + TTF  | 30516.978         |
|         | G1 Rpt2 - TTF  | 27787.099         |
|         | G1 Rpt2 + TTF  | 29009.513         |
| BRCA1   | G1 Rpt1 - TTF  | 21155.563         |
|         | G1 Rpt 1 + TTF | 15763.25          |
|         | G1 Rpt2 - TTF  | 25052.827         |
|         | G1 Rpt2 + TTF  | 17406.371         |

Figure 5A and 5B

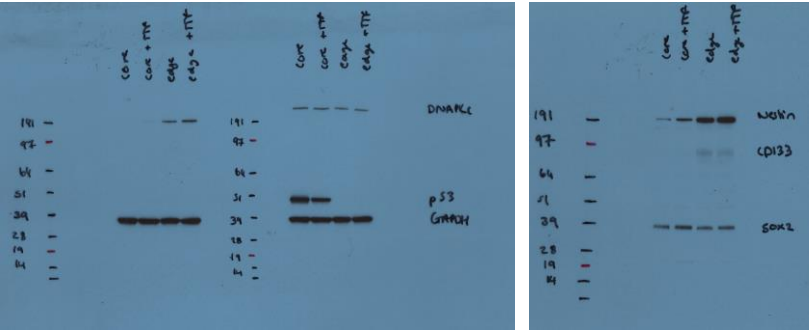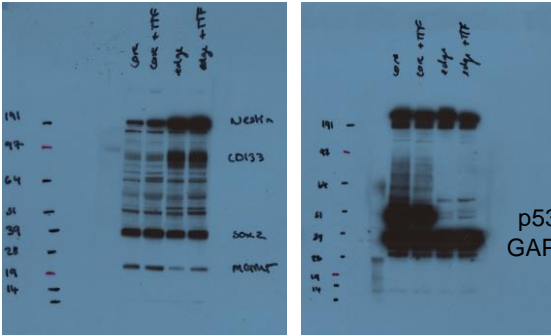

Figure 5C

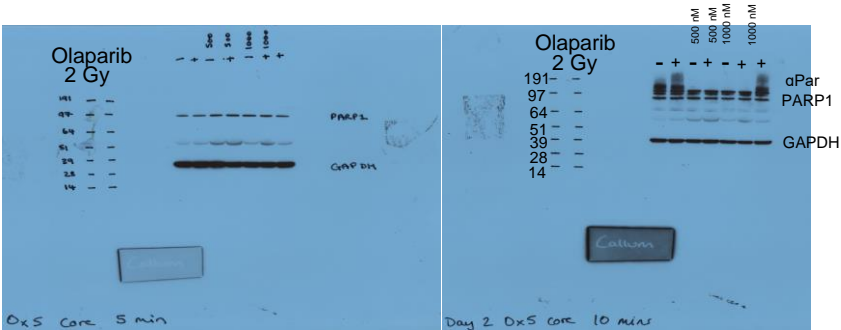

Figure 5F

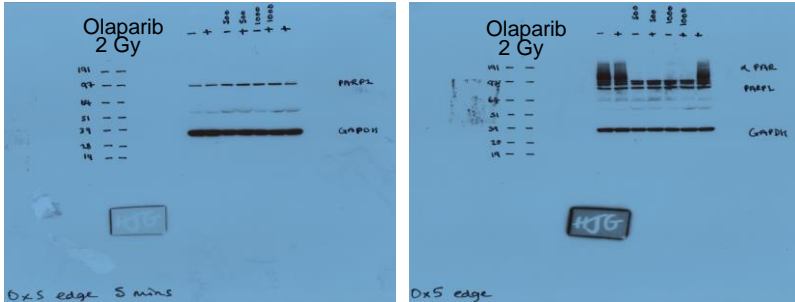

Supplement: s1 [file s1]
